# Supplementary material for: Irbesartan in Marfan syndrome (AIMS): a double-blind, placebo-controlled randomised trial
Source: PubMed Central journal article supplement (PMC6934233; doi:10.1016/s0140-6736(19)32518-8), 2019-12-21
Supplement: mmc1.pdf [file mmc1.pdf]

# THE LANCET

## Supplementary appendix

This appendix formed part of the original submission and has been peer reviewed.  
We post it as supplied by the authors.

Supplement to: Mullen M, Jin XY, Child A, et al. Irbesartan in Marfan syndrome (AIMS):  
a double-blind, placebo-controlled randomised trial. *Lancet* 2019; published online  
Dec 10. [http://dx.doi.org/10.1016/S0140-6736\(19\)32518-8](http://dx.doi.org/10.1016/S0140-6736(19)32518-8).

## **SUPPLEMENTARY APPENDIX**

### **Effects of Irbesartan on Aortic Root Dilatation in Marfan syndrome**

#### **The Aortic Irbesartan Marfan Study (AIMS)**

#### **Collaborating centres and staff (Principal Investigators in bold)**

##### **Aberdeen Royal Infirmary (5)**

**John Dean**, Bartosz Was, Heather Gow, Jane Murray, Mariella D'Allessandro, Michael Christie, Patricia Cooper, Philip Booth, Sharon Burns, Yvonne Paterson

##### **Birmingham Children's Hospital (2)**

**Ashish Chikermane**, Anthony Assing, Catherine Cotter, Gillian Atkins, Helen Williamson

##### **Cumberland Infirmary (1)**

**Justin Barclay**, Alan Jennison, Alex Henderson, Anna McSkeane, Helen Fairlamb, Julie Kelly, Nicola Kelsall, Scott Prentice

##### **Freeman Hospital (5)**

**John O'Sullivan**, Alison Head-Baister, Angela Phillipson, Anna Johnson, D Crossland, Jack Oliver, Jade Davison, Jill Wake, Louise Quinn, Maureen Foreman, Vera Wealleans

##### **Golden Jubilee National Hospital (1)**

**Niki Walker**, Alexis Duncan, Evelyn Tibbs, Ruth Kelly

##### **Great Ormond Street Hospital (6)**

**Sachin Khambadkone**, Bridget Zotti, Cassie Brady, Elena Cervi, Ella Field, Eszter Szepezvary, Florence Mantey, Gillian Riley, Heather Titmus, Ilaria Bo, Juan Pablo Kaski, Loren Green, Nigel Jones, Rebecca Banks

##### **Guy's and St Thomas' (13)**

**Christopher Kiesewetter**, **Sujeev Mathur**, Alessandra Frigiola, Alex Savis, Holly Belfield, Josephine Guzman, Julia Harris, Karen Wilson, Kelly Peacock, Kirsty Gibson, Paul Wellman, Professor John Simpson, Saleha Kabir, Sitali Mushemi

##### **James Cook University Hospital (12)**

**Michael Stewart**, Bev Atkinson, Cath Richardson, Elaine Leng, Paul Brennan

##### **Leeds General Infirmary (20)**

**John Thomson**, Annabel Nixon, Collette Spencer, James Oliver, Jan Forster, Louise Turner, Samantha Bainbridge

##### **Ninewells Hospital and Medical School (2)**

**Anna Maria Choy**, Adelle Dawson, Gwen Kiddie, Heather Kerr, Ify Mordi, Jackie Duff, Jacqueline Dunlop, Jonathan Berg, Pauline Armory

##### **Norfolk and Norwich University Hospitals (4)**

**Leisa Freeman**, Amir Anwar, Charles Graham, Clare London, Gail Healey, Ian Gallagher, Mary Isley, Rizwan Ahmed, Sheila Wood

**Northern General Hospital (2)**

**Nigel Wheeldon**, Cecilia Mason, Farook Nassim, Janet Middle, Justin Adams, Karen Angelini, Kay Housley, Kim Ryalls, Michael Agyemang, Rachel Walker, Robina Batigan, Tina Bennett

**Queen Elizabeth Hospital Birmingham (11)**

**Paul Clift**, Amor Mia B. Alviator, Annette Nilsson, Carole Green, Charlotte Crook, Connie Becani Palmer, Elizabeth Dwenger, Phillipa Doherty, Rebecca Igbokwe, Saba Sharif, Sonia MacDonald

**Royal Brompton Hospital (17)**

**Lorna Swan**, Cathy West, Kevin Kirby, Nitha Naqvi, Sophie Welch, Suad Warsama, Wei Li, Zohreh Farzad

**Royal Hospital for Children, Glasgow (10)**

**Ben Smith, Victoria Murday**, Alexis Duncan, Eamonn Murtagh, Emma Adams, Lesley Armour, Stuart Lilley

**St Bartholomew's Hospital (11)**

**Bejal Pandya**, Amy Richards, Mervyn Andiapen, Rebecca Macrae

**St George's Hospital (26)**

**Anne Child**, Maite Tome, Carmel Hutchinson, Kameka Angulo, Rooba Kauppayamootoo, Sabiha Gati, Elizabeth Cruddas

**St Mary's Hospital, Manchester (2)**

**William G Newman**, Catherine Breen

**University Hospital of Wales (4)**

**Dhavendra Kumar, Dirk G Wilson**, Adele Farrugia, Alan Fraser, Jayne Summers, Jessie Powell, Julie Edwards, Terese Hale, Zoe Boulton

**University Hospital Southampton (6)**

**Aisling Carroll, Gruschen Veldtman**, Andrew Ho, David Black, Lisa Fletcher, Sue Mapstone, Tara Bharucha

**University Hospitals Bristol (30)**

**Graham Stuart**, Gary Marsh, Joanne Jones, Karen Sheehan, Kathleen Selway, Kirsty Stevenson, Martin Nelson, Rebecca Fairweather, Stephanie Curtis, Sue Simpson

**Western General Hospital (2)**

**Martin Denvir**, Audrey White, Jill Steven, Joanna Munro, Wayne Lam

### **Trial Steering Committee**

David Crossman (Independent Chair), Anne Child, Tim Clayton, Marcus Flather, Ira Jakupovic (Sponsor representative), Xu Yu Jin, Rosemary Knight, Michael Mullen, Graham Stuart, Laura Van Dyck, Shannan Amoils (British Heart Foundation)

### **Data Monitoring Committee**

William Toff (Chair), Mario Petrou, Paul Silcocks, Raymond MacAllister. Statistical reports provided by Matthew Dodd and Thomas Godec

### **Clinical Event Adjudicators**

Michael Mullen, Graham Stuart

### **Additional details for statistical analysis**

The formula used for the statistical model for the primary analysis is as follows:

$$Y_{ij} = (\beta_0 + u_{0j}) + (\beta_1 + \beta_2 treatment_j + u_{1j})time_i + e_{ij}$$

Where:

- $i = 0, \dots, m$ , is the  $i^{th}$  time-point (in years) out of  $m$  time-points
- $j = 1, \dots, n$ , is the  $j^{th}$  participant out of a total of  $n$  participants in the trial
- $Y_{ij}$  is the aortic root diameter of the  $j^{th}$  participant at the  $i^{th}$  time-point (in years)
- $treatment_j$  is 0 if the  $j$ th participant is in the placebo group and 1 if they are in the active (Irbesartan) group
- $\beta_0$  is the estimated mean aortic root diameter at baseline
- $\beta_1$  is the estimated mean annual rate of change in aortic root diameter in the placebo group
- $\beta_2$  is the estimated difference in the mean annual rates between the active (Irbesartan) and placebo groups
- $\begin{pmatrix} u_{0j} \\ u_{1j} \end{pmatrix} \sim N\left(\begin{pmatrix} 0 \\ 0 \end{pmatrix}, \Sigma_u\right)$  are the random effects and  $\Sigma_u = \begin{pmatrix} \sigma_{u_{00}}^2 & \sigma_{u_{01}} \\ \sigma_{u_{01}} & \sigma_{u_{11}}^2 \end{pmatrix}$
- $e_{ij} \sim N(0, \sigma_e^2)$  are the error terms

## **Methods for TGF-beta measurement**

Whole blood was collected from an antecubital forearm vein into a serum separator tube (SST) and allowed to clot for 30 minutes at room temperature. For complete release of TGF-1, the samples were refrigerated overnight at 2-8°C. Following overnight incubation, samples are centrifuge for 15 minutes at 1,000g. The resulting serum was decanted and stored frozen at -70°C. Stored samples were thawed at room temperature. Samples required activation by addition of 20 mL of 1N HCl, mixed by vortexing and allowed to incubate at room temperature for 10 minutes. Acidified samples are then neutralised by addition of 20 mL 1.2 N NaOH/0.5 M HEPES. Prior to assaying, activated samples were diluted 20 fold in the manufactures calibrator diluent. The TFG-b was determined by enzyme linked immunosorbent assay (R&D Systems, Abingdon, Oxfordshire, UK). 50 mL of assay diluent is added to each well of the supplied 96-well microtitre plate. 50 mL of standard, control, or activated sample was added to the well. The plate was incubated for 2 hours at room temperature on an automated plate shaker. Following incubation each well was aspirated and washed, repeating the process three times for a total of four washes using 400 mL of wash buffer. After the last wash any remaining wash buffer is removed by decanting and inverting the plate and blotting against clean paper towels. 100 mL of TGF-b conjugate is added to each well. The plate was further incubated for 2 hours at room temperature. The aspiration and wash was repeated a further 4 times. 100 mL of substrate solution was then added to each well and incubated for 30 minutes at room temperature in the dark. 100 mL of stop solution was added to each well, tapping the plate to ensure thorough mixing. The optical density was read within 30 minutes, using a microplate reader set to 450 nm with wavelength correction set to 540 nm or 570 nm. The TG3F-b assay has a reportable range of 1.7 to 2,000 ng/L. Total precision was 6.4 to 9.3% in the range 79 to 730 ng/L.

**Table S1: Tolerability of trial medication over time**

|                              | Year 1  |            | Year 2  |            | Year 3  |            |
|------------------------------|---------|------------|---------|------------|---------|------------|
|                              | Placebo | Irbesartan | Placebo | Irbesartan | Placebo | Irbesartan |
| Number attending visit       | 85      | 93         | 80      | 88         | 75      | 80         |
| Number taking medication     | 83      | 88         | 76      | 81         | 70      | 76         |
| Number tolerating medication | 82      | 86         | 75      | 81         | 68      | 75         |

  

|                              | Year 4  |            | Year 5  |            |
|------------------------------|---------|------------|---------|------------|
|                              | Placebo | Irbesartan | Placebo | Irbesartan |
| Number attending visit       | 62      | 60         | 31      | 29         |
| Number taking medication     | 56      | 53         | 27      | 23         |
| Number tolerating medication | 56      | 52         | 27      | 23         |

There were no statistical differences between groups at any time point. At the final follow up visit the majority of patients had not reached five years of study participation which accounts for the sharp decrease in numbers available for follow up between year 4 and 5.

**Table S2: Peak dosage tolerated by body weight**

| Weight at baseline | Peak dosage tolerated (mg) |     |     | Total |
|--------------------|----------------------------|-----|-----|-------|
|                    | 75                         | 150 | 300 |       |
| <b>&lt;50 kg</b>   |                            |     |     |       |
| Placebo            | 0                          | 3   | 23  | 26    |
| Irbesartan         | 0                          | 5   | 25  | 30    |
| Overall            | 0                          | 8   | 48  | 56    |
| <b>≥50 kg</b>      |                            |     |     |       |
| Placebo            | 2                          | 10  | 49  | 61    |
| Irbesartan         | 5                          | 13  | 56  | 74    |
| Overall            | 7                          | 23  | 105 | 135   |
| <b>Total</b>       | 7                          | 31  | 153 | 191   |

Weight values provided are at study entry. Patients generally gained weight during the course of the study and if they transitioned from <50kg to >50kg this allowed up-titration to 300mg if tolerated.

**Table S3: Peak dosage tolerated by age**

| Age at baseline     | Peak dosage tolerated (mg) |     |     | Total |
|---------------------|----------------------------|-----|-----|-------|
|                     | 75                         | 150 | 300 |       |
| <b>&lt;18 years</b> |                            |     |     |       |
| Placebo             | 1                          | 6   | 38  | 45    |
| Irbesartan          | 0                          | 10  | 38  | 48    |
| Overall             | 1                          | 16  | 76  | 93    |
| <b>≥18 years</b>    |                            |     |     |       |
| Placebo             | 1                          | 7   | 34  | 42    |
| Irbesartan          | 5                          | 8   | 43  | 56    |
| Overall             | 6                          | 15  | 77  | 98    |
| <b>Total</b>        | 7                          | 31  | 153 | 191   |

**Table S4. End diastolic aortic root diameter in the placebo and irbesartan groups over time**

|                                                  | Rate of change in end diastolic aortic root diameter (mm/year), mean (95% CI) |                           | Difference in rates (mm/year) (95% CI) |
|--------------------------------------------------|-------------------------------------------------------------------------------|---------------------------|----------------------------------------|
|                                                  | Placebo                                                                       | Irbesartan                |                                        |
|                                                  | 0.82 (0.68 to 0.96)                                                           | 0.62 (0.49 to 0.76)       | -0.20 (-0.39 to -0.01);<br>p = 0.038   |
|                                                  | End diastolic aortic root diameter (mm), mean (95% CI)                        |                           | Difference in means (95% CI)           |
|                                                  | Placebo                                                                       | Irbesartan                |                                        |
| <b>Baseline,</b><br><b>mean (SD)</b><br><b>N</b> | 32.9 (5.9)<br>88                                                              | 33.1 (5.6)<br>104         |                                        |
| <b>1 year</b><br><b>N</b>                        | 33.9 (33.1 to 34.8)<br>85                                                     | 33.1 (32.3 to 34.0)<br>94 | -0.81 (-1.35 to -0.28);<br>p = 0.003   |
| <b>2 years</b><br><b>N</b>                       | 34.6 (33.7 to 35.5)<br>77                                                     | 34.0 (33.2 to 34.9)<br>85 | -0.59 (-1.23 to 0.06);<br>p = 0.076    |
| <b>3 years</b><br><b>N</b>                       | 35.4 (34.5 to 36.2)<br>71                                                     | 34.8 (33.9 to 35.6)<br>79 | -0.60 (-1.24 to 0.03);<br>p = 0.063    |
| <b>4 years</b><br><b>N</b>                       | 36.2 (35.3 to 37.2)<br>57                                                     | 35.2 (34.3 to 36.2)<br>56 | -1.00 (-1.91 to -0.09);<br>p = 0.030   |
| <b>5 years</b><br><b>N</b>                       | 37.6 (36.5 to 38.8)<br>29                                                     | 36.6 (35.4 to 37.8)<br>29 | -1.02 (-2.45 to 0.42);<br>p = 0.16     |

CI = confidence interval; SD= standard deviation  
Comparisons are made between groups at each time point.

**Table S5: TGF beta values at baseline and one year**

|                 | <b>Log TGF-beta (log(ng/L)), mean (95% CI)</b> |                             | <b>Difference in means,<br/>mean (95% CI)</b> |
|-----------------|------------------------------------------------|-----------------------------|-----------------------------------------------|
|                 | <b>Placebo</b>                                 | <b>Irbesartan</b>           |                                               |
| <b>Baseline</b> | 5.43 (5.29 to 5.58)<br>N=30                    | 5.43 (5.29 to 5.58)<br>N=37 | -                                             |
| <b>1 Year</b>   | 5.40 (5.24 to 5.55)<br>N=42                    | 5.29 (5.14 to 5.45)<br>N=47 | -0.10 (-0.25 to 0.05)<br>p = 0.18             |



**Table S6. Systolic and diastolic blood pressure in the placebo and irbesartan groups over time**

|                                  | <b>Systolic blood pressure (mmHg), mean (95% CI)</b>  |                              | <b>Difference in means (95% CI), p</b> |
|----------------------------------|-------------------------------------------------------|------------------------------|----------------------------------------|
|                                  | Placebo                                               | Irbesartan                   |                                        |
| <b>Baseline, mean (SD)<br/>N</b> | 109.0 (15.3)<br>87                                    | 110.4 (15.8)<br>104          |                                        |
| <b>1 year<br/>N</b>              | 115.3 (112.5 to 118.2)<br>84                          | 109.0 (106.2 to 111.7)<br>93 | -6.3 (-9.8 to -2.9);<br>p<0.001        |
| <b>2 years<br/>N</b>             | 116.2 (113.3 to 119.1)<br>79                          | 110.1 (107.4 to 112.9)<br>88 | -6.1 (-9.6 to -2.5);<br>p = 0.001      |
| <b>3 years<br/>N</b>             | 116.4 (113.7 to 119.2)<br>74                          | 110.5 (107.8 to 113.1)<br>78 | -6.0 (-9.4 to -2.6);<br>p = 0.001      |
| <b>4 years<br/>N</b>             | 117.8 (114.8 to 120.7)<br>60                          | 110.9 (107.9 to 113.9)<br>58 | -6.8 (-10.8 to -2.8);<br>p = 0.001     |
| <b>5 years<br/>N</b>             | 119.8 (115.8 to 123.8)<br>28                          | 110.1 (106.1 to 114.1)<br>28 | -9.7 (-14.9 to -4.5);<br>p<0.001       |
|                                  | <b>Diastolic blood pressure (mmHg), mean (95% CI)</b> |                              | <b>Difference in means (95% CI)</b>    |
|                                  | Placebo                                               | Irbesartan                   |                                        |
| <b>Baseline, mean (SD)<br/>N</b> | 64.0 (11.0)<br>87                                     | 65.6 (12.1)<br>104           |                                        |
| <b>1 year<br/>N</b>              | 70.0 (67.8 to 72.3)<br>85                             | 66.4 (64.2 to 68.5)<br>93    | -3.6 (-6.5 to -0.8);<br>p = 0.013      |
| <b>2 years<br/>N</b>             | 70.8 (68.7 to 72.9)<br>79                             | 67.1 (65.1 to 69.1)<br>88    | -3.7 (-6.4 to -1.0);<br>p = 0.007      |
| <b>3 years<br/>N</b>             | 71.2 (69.1 to 73.3)<br>74                             | 65.6 (63.6 to 67.6)<br>78    | -5.6 (-8.3 to -2.9);<br>p<0.001        |
| <b>4 years<br/>N</b>             | 72.1 (70.0 to 74.2)<br>60                             | 66.5 (64.4 to 68.7)<br>58    | -5.5 (-8.4 to -2.7);<br>p<0.001        |
| <b>5 years<br/>N</b>             | 73.7 (70.9 to 76.5)<br>28                             | 66.2 (63.4 to 69.0)<br>28    | -7.5 (-11.3 to -3.7);<br>p<0.001       |

CI = confidence interval; SD= standard deviation  
Comparisons are made between groups at each time point.

**Table S7. Serious Adverse Events (SAEs)**

|                    | <b>Placebo<br/>(n = 88)</b> | <b>Irbesartan<br/>(n = 104)</b> |
|--------------------|-----------------------------|---------------------------------|
| Number with ≥1 SAE | 21 (23.9%)                  | 24 (23.1%)                      |
| Number with no SAE | 67 (76.1%)                  | 80 (76.9%)                      |

**Table S8. Cardiac and non-cardiac Serious Adverse Events (SAEs)**

|                  | <b>Placebo<br/>(n = 88)</b> | <b>Irbesartan<br/>(n = 104)</b> |
|------------------|-----------------------------|---------------------------------|
| Cardiac SAEs     | 8 (9.1%);                   | 8 (7.7%);                       |
| N                | 9                           | 10                              |
| Non-cardiac SAEs | 16 (18.2%);                 | 19 (18.3%);                     |
| N                | 32                          | 27                              |
| Total            | 21 (23.9%);                 | 24 (23.1%);                     |
| N                | 41                          | 37                              |

Data are presented as the number (%) of participants with an SAE; total number of SAEs. Of the cardiac SAEs there were 5 aortic surgical procedures in the irbesartan group (2 elective aortic root repairs and 3 elective external stent procedures) and 4 in the placebo group (3 elective aortic root repairs and one emergency aortic dissection) and there were no deaths during the trial.

**Figure S1. Measurement of aortic diameter: the yellow arrow line indicates the maximal diameters at the aortic sinus level.**

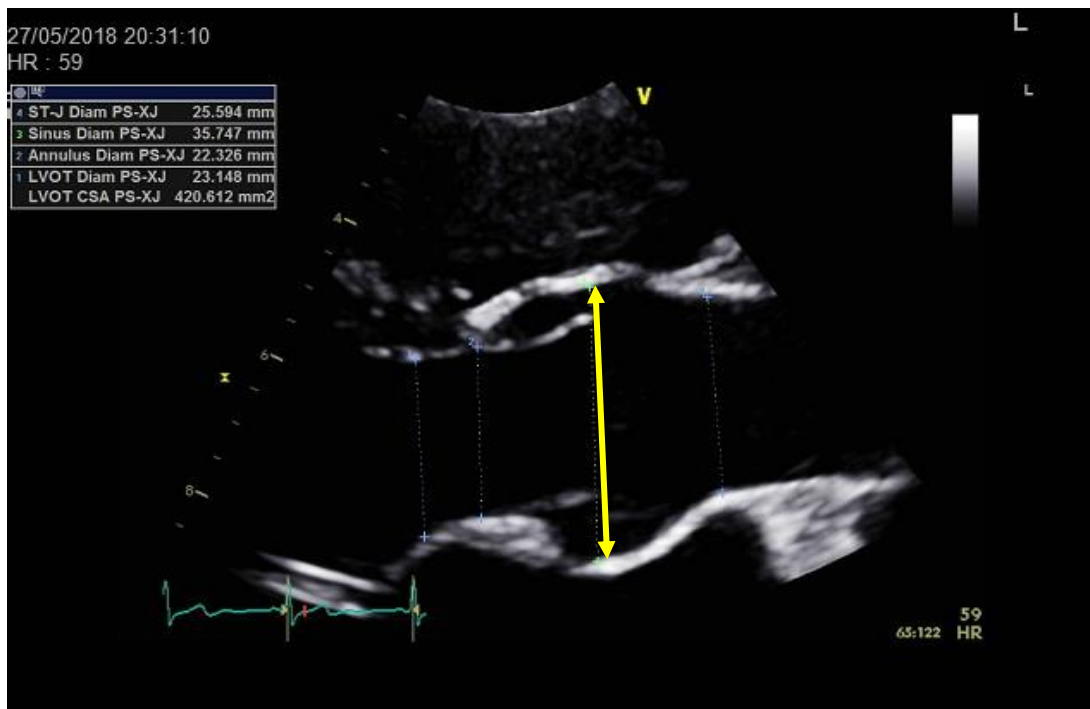

**Figure S2. Panel A. Mean systolic blood pressure over time**

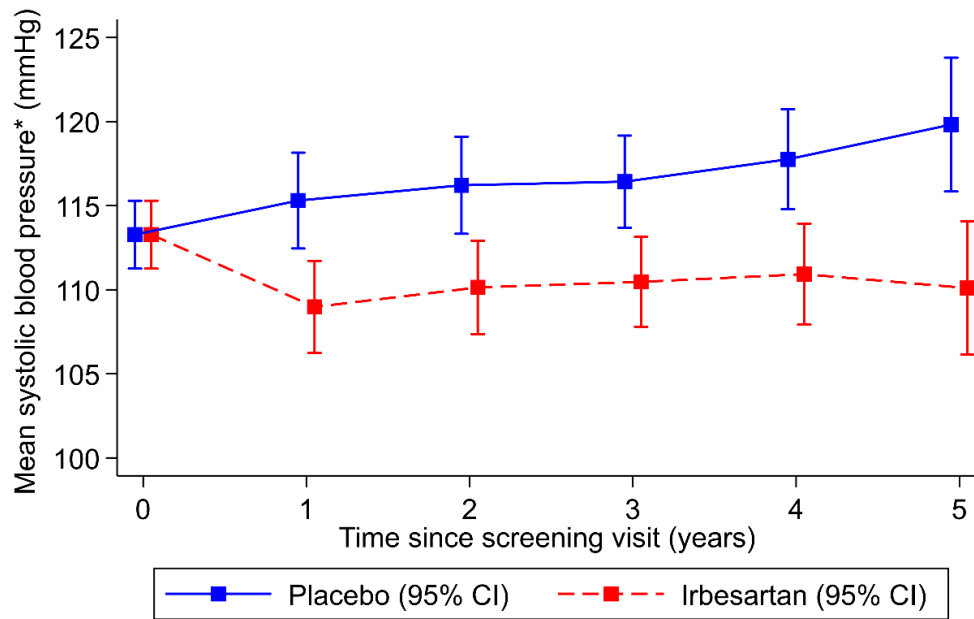

Number followed up

|            |     |    |    |    |    |    |
|------------|-----|----|----|----|----|----|
| Placebo    | 87  | 84 | 79 | 74 | 60 | 28 |
| Irbesartan | 104 | 93 | 88 | 78 | 58 | 28 |

**Panel B. Mean diastolic blood pressure over time**

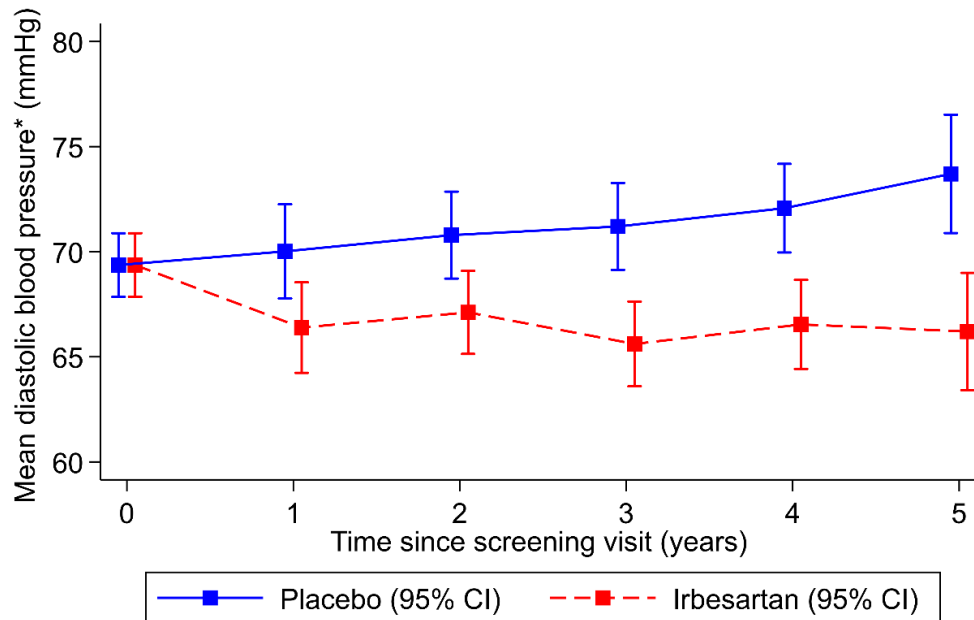

Number followed up

|            |     |    |    |    |    |    |
|------------|-----|----|----|----|----|----|
| Placebo    | 87  | 85 | 79 | 74 | 60 | 28 |
| Irbesartan | 104 | 93 | 88 | 78 | 58 | 28 |

\* estimated using a linear mixed effects model for repeated measures. CI – confidence interval.

**Figure S3. Mean end diastolic aortic root diameter over time**

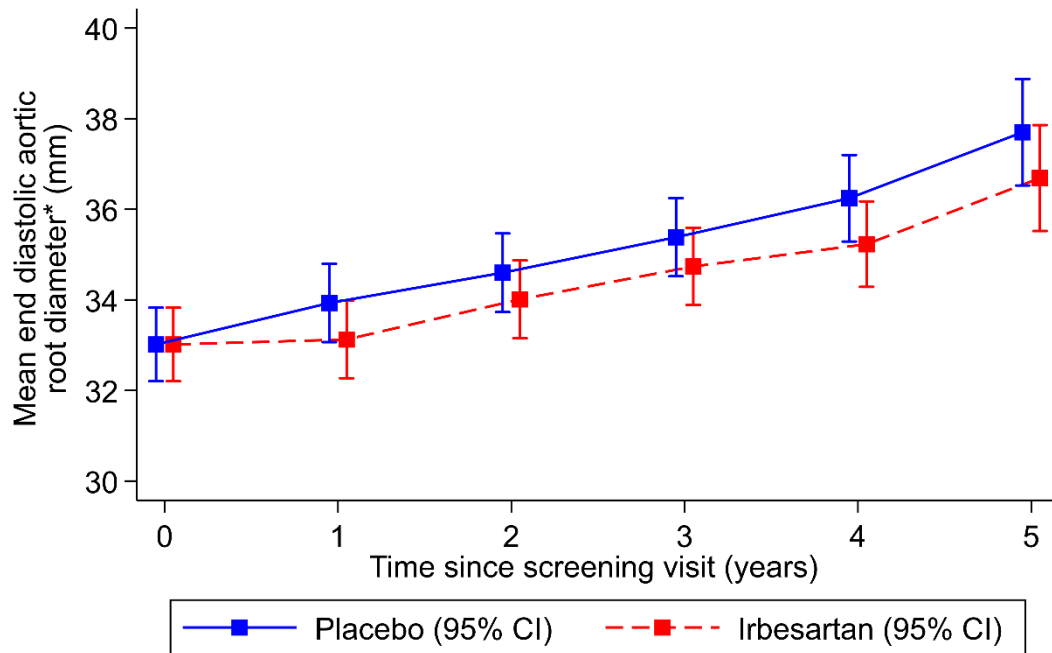

| Number followed up |     | 0  | 1  | 2  | 3  | 4  | 5 |
|--------------------|-----|----|----|----|----|----|---|
| Placebo            | 88  | 85 | 77 | 71 | 57 | 29 |   |
| Irbesartan         | 104 | 94 | 85 | 79 | 56 | 29 |   |

\* estimated using a linear mixed effects model for repeated measures. CI – confidence interval.
